# Supplementary material
Source: HighWire-hosted journal article supplement (http://www.cmajopen.ca/highwire/filestream/81103/field_highwire_adjunct_files/3/2017-0138-4-at.pdf)
Supplement: 2017-0138-4-at.pdf [file 2017-0138-4-at.pdf]

## Appendix 4 (as supplied by the authors)

**Supplemental Table 1.** Results of negative binomial regression model analyzing routine chest X-ray (CXR) use over time in Ontario (n = 2,847,508).

| Factor*                           | Adjusted RR <sup>a</sup><br>(95% CI) | P value |
|-----------------------------------|--------------------------------------|---------|
| Time (fiscal quarter)             | 0.98 (0.97-0.98)                     | < .001  |
| April-June vs January-March       | 0.92 (0.88-0.96)                     | < .001  |
| July-September vs January-March   | 0.91 (0.88-0.95)                     | < .001  |
| October-November vs January-March | 0.90 (0.86-0.93)                     | < .001  |
| LHIN                              |                                      |         |
| 2 vs 1                            | 0.45 (0.42-0.49)                     | < .001  |
| 3 vs 1                            | 0.49 (0.45-0.53)                     | < .001  |
| 4 vs 1                            | 0.54 (0.50-0.58)                     | < .001  |
| 5 vs 1                            | 0.69 (0.64-0.74)                     | < .001  |
| 6 vs 1                            | 0.70 (0.65-0.75)                     | < .001  |
| 7 vs 1                            | 0.93 (0.86-0.99)                     | .032    |
| 8 vs 1                            | 1.21 (1.13-1.29)                     | < .001  |
| 9 vs 1                            | 1.37 (1.29-1.46)                     | < .001  |
| 10 vs 1                           | 0.40 (0.36-0.44)                     | < .001  |
| 11 vs 1                           | 0.41 (0.38-0.44)                     | < .001  |
| 12 vs 1                           | 0.51 (0.47-0.55)                     | < .001  |
| 13 vs 1                           | 0.66 (0.60-0.71)                     | < .001  |
| 14 vs 1                           | 1.04 (0.95-1.15)                     | < .001  |

Notes: \*all factors significant at  $P < 0.05$ ; RR = relative risk; CI = confidence interval.

<sup>a</sup> adjusted for all other factors present in the table.

**Supplemental Table 2.** Patient- and provider-level indicators for a routine chest X-ray (CXR) being ordered on the same day as a periodic health examination based on a multilevel logistic regression with a random intercept for practice-level effects,  $N = 1,709,206$ .

| <u>Fixed Effects, OR<sup>a</sup> (95% CI)</u> |                     |
|-----------------------------------------------|---------------------|
| <i>Time-based variables</i>                   |                     |
| Time (fiscal quarter)                         | 0.98 (0.97-0.98)*** |
| April-June vs January-March                   | 0.91 (0.87-0.96)*** |
| July-September vs January-March               | 0.91 (0.88-0.95)*** |
| October-November vs January-March             | 0.89 (0.85-0.94)*** |
| <i>Patient characteristics</i>                |                     |
| Age, years (y)                                |                     |
| 45-64 vs 18-44                                | 1.69 (1.65-1.74)*** |
| 65+ vs 18-44                                  | 2.06 (1.96-2.17)*** |
| Male                                          | 2.46 (2.39-2.53)*** |
| Rural                                         | 0.94 (0.88-1.01)    |
| Income quintile                               |                     |
| 2 vs 1 (lowest)                               | 0.98 (0.94-1.02)    |
| 3 vs 1 (lowest)                               | 0.88 (0.84-0.92)*** |
| 4 vs 1 (lowest)                               | 0.88 (0.84-0.91)*** |
| 5 vs 1 (lowest)                               | 0.76 (0.73-0.79)*** |
| Hospitalization - past 5 y                    | 0.87 (0.83-0.92)*** |
| Mental health diagnosis - past 5 y            | 0.87 (0.83-0.91)*** |
| Dementia diagnosis – past 5 y                 | 1.25 (1.02-1.53)*   |
| Rheumatologic disease diagnosis – past 5 y    | 0.97 (0.91-1.04)    |
| <i>Physician characteristics</i>              |                     |
| Male                                          | 1.57 (1.51-1.62)*** |
| IMG                                           | 0.95 (0.92-0.98)**  |
| Years since graduation                        |                     |
| 21-30 vs ≤20                                  | 1.29 (1.25-1.34)*** |
| > 30 vs ≤20                                   | 1.81 (1.74-1.87)*** |
| Primary care practice model <sup>b</sup>      |                     |
| Family health group vs FFS                    | 0.97 (0.93-1.02)    |
| Family health network vs FFS                  | 0.56 (0.34-0.92)*   |
| Family health organization vs FFS             | 0.83 (0.77-0.90)*** |
| Family health team vs FFS                     | 0.93 (0.86-1.02)    |
| Other vs FFS                                  | 1.60 (1.40-1.83)*** |
| <u>Random Effects<sup>c</sup></u>             |                     |
| Variance (SE)                                 | 0.65 (0.04)         |
| MOR (95% CI)                                  | 2.16 (2.08-2.24)    |
| ICC <sup>c</sup> , %                          | 16.5                |

Notes: Significant at  $P < 0.05$ \*,  $P < 0.01$ \*\*,  $P < 0.001$ \*\*\*; OR = odds ratio; CI = confidence interval; IMG = international medical graduate; FFS = fee-for-service SE = standard error; MOR = median odds ratio; ICC = intraclass correlation coefficient;

---

All reported values based on SAS PROC GLIMMIX output; model estimation method = RSPL; denominator degrees of freedom estimation method = between and within (bw); covariance structure = standard variance (vc).

<sup>a</sup> Adjusted for all other factors present in the table.

<sup>b</sup> Represents the primary care patient enrollment model which informs practice organization and remuneration.

<sup>c</sup> Estimated based on the distribution of random, practice-specific intercepts.

<sup>d</sup> Calculated using the linear threshold method.

---
